# Supplementary material for: Genome editing of PD-L1 mediated by nucleobase-modified polyamidoamine for cancer immunotherapy
Source: Royal Society of Chemistry journal article supplement (doi:10.1039/d1tb02688g), 2022-01-01
Supplement: d1tb02688g1.pdf [file d1tb02688g1.pdf]

## Supporting Information

### Genome editing of PD-L1 mediated by nucleobase-modified polyamidoamine for cancer immunotherapy

Simeng Wei,<sup>a,b</sup> Xinxin Shao,<sup>b</sup> Yong Liu,<sup>b</sup> Boyu Xiong,<sup>b</sup> Pengfei Cui,<sup>a,b</sup>

Ziling Liu,<sup>a,\*</sup> and Quanshun Li<sup>b,\*</sup>

*<sup>a</sup>Department of Cancer Center, The First Hospital of Jilin University, Changchun  
130012, China*

*<sup>b</sup>Key Laboratory for Molecular Enzymology and Engineering of Ministry of Education,  
School of Life Sciences, Jilin University, Changchun 130012, China*

\*Corresponding authors.

Tel. and Fax: +86-431-85155200.

E-mail: [quanshun@jlu.edu.cn](mailto:quanshun@jlu.edu.cn) (Q. Li); [ziling@jlu.edu.cn](mailto:ziling@jlu.edu.cn) (Z. Liu).

## **Materials and methods**

### **1. Cytotoxicity analysis of AP-PAMAM and PAMAM**

B16F10 cells were inoculated in 96-well plates at a density of 7,000 cells/well. After the culture for 12 h, different concentrations of PAMAM and AP-PAMAM were added into each well, and the cells were incubated for 48 h. Subsequently, MTT solution was added into each well at a final concentration of 0.5 mg/mL. After the incubation for additional 4 h, the supernatant was discarded, and 150  $\mu$ L dimethyl sulfoxide was used to dissolve the formazan crystals. After 10 min, the absorbance at 490 nm of each well was measured using HBS-1096A microplate reader (Detie, Nanjing, China) to calculate the cell viability.

### **2. *In vitro* transfection efficiency analysis of AP-PAMAM/pX458 nanoparticles**

B16F10 cells were inoculated in 6-well plates at a density of  $2.0 \times 10^5$  cells/well. After the culture for 12 h, the medium was replaced with FBS-free DMEM containing AP-PAMAM/pX458 or PAMAM/pX458 nanoparticles with different N/P ratios. The final concentration of plasmid in all supernatants was 2  $\mu$ g/mL. After the incubation for 4 h, the supernatant was discarded and replaced with 10% FBS-containing DMEM. Finally, the expression level of GFP protein after 48 h was detected using Olympus IX73P1F fluorescence microscope (Tokyo, Japan) and CytoFLEX flow cytometer (Beckman Coulter Inc., Kraemer Boulevard Brea, CA, USA).

### **3. Measurement of serum biochemical indicators**

Whole blood was allowed to stand at room temperature for 2 h and then centrifuged at 3,000 rpm for 15 min (4 °C) to obtain the supernatant. The samples were treated with the appropriate assay kits according to the manufacturers' instructions, and the serum biochemical indicators were analyzed on a Chemray-800 Full Automatic Biochemistry Analyzer (Rayto Life Sciences, Shenzhen, China).

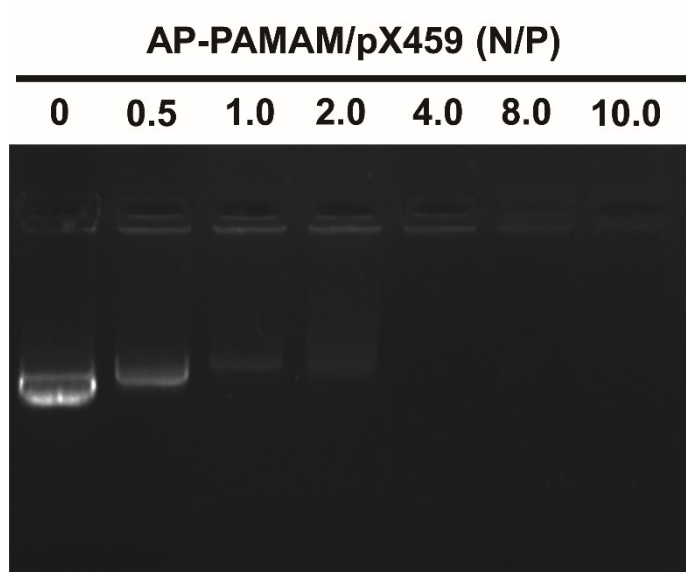

**Figure S1.** Gel retardation assay of AP-PAMAM/pX459 nanoparticles at different N/P ratios.

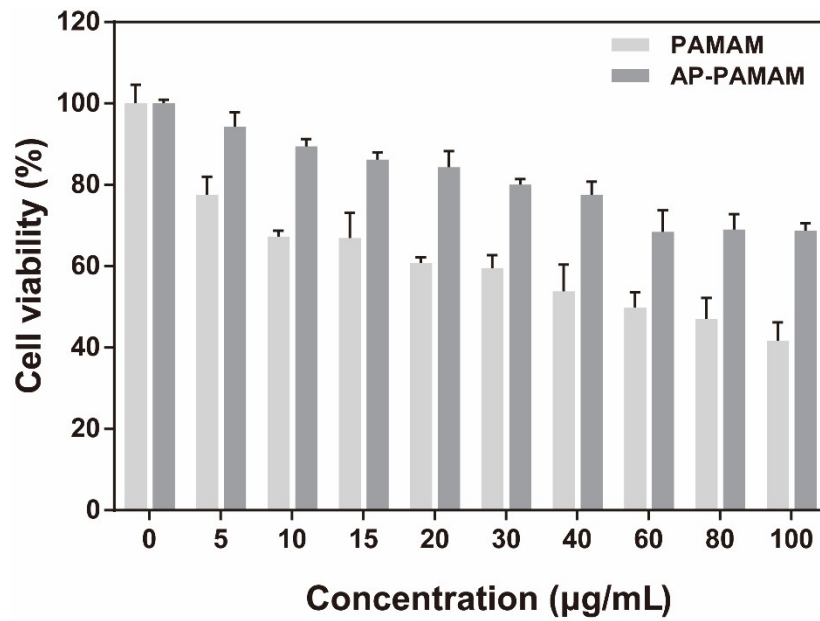

**Figure S2.** Cell viability of B16F10 cells after the treatment with PAMAM and AP-PAMAM at different concentrations. Data were represented as mean value  $\pm$  SD (n = 3).

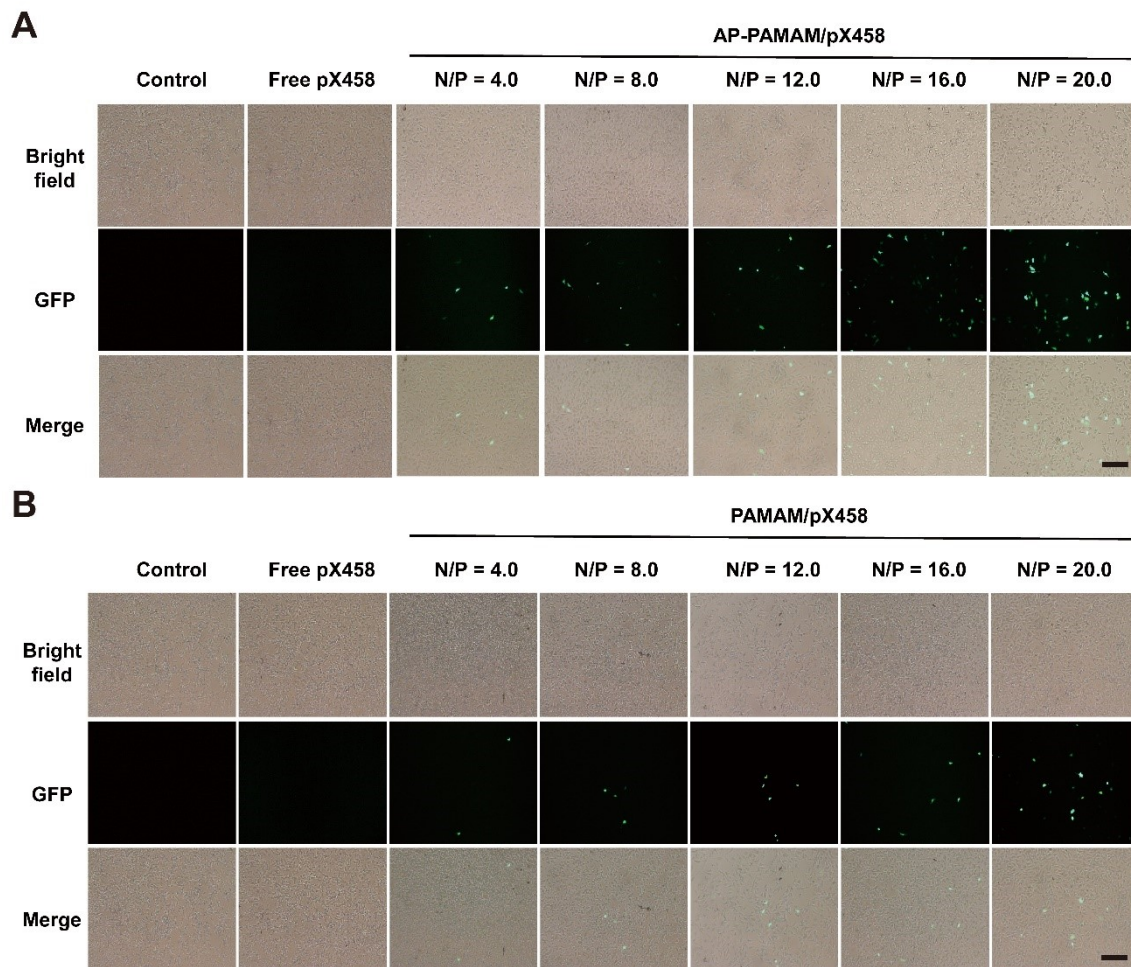

**Figure S3.** The fluorescence images of B16F10 cells after the carriers-mediated transfection of pX458. The scale bar was 200  $\mu\text{m}$ .

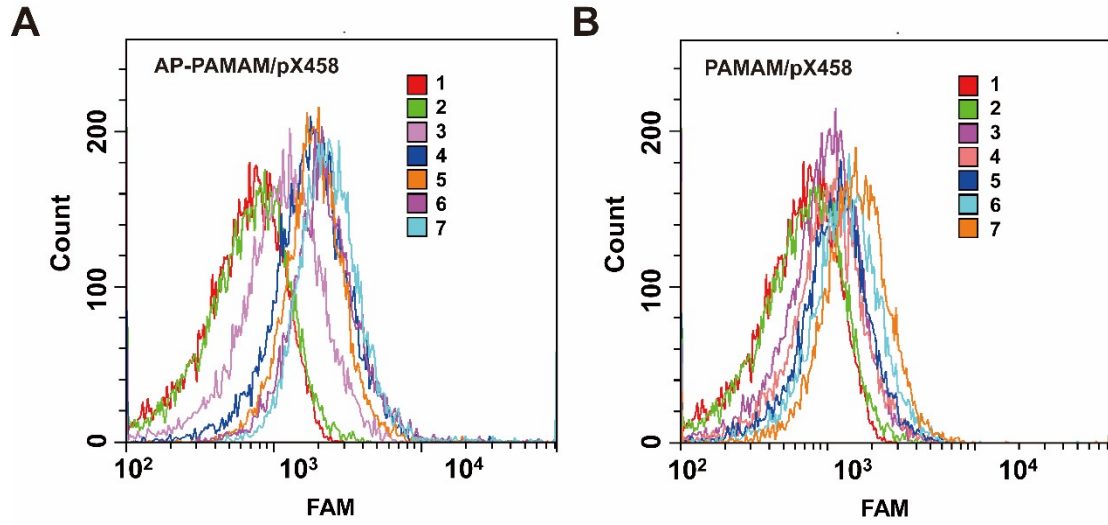

**Figure S4.** Flow cytometric analysis of GFP expression in B16F10 cells after the transfection of AP-PAMAM/pX458 (A) and PAMAM/pX458 (B): (1) untreated cells, (2) free pX458 group, and AP-PAMAM/pX458 or PAMAM/pX458 transfection at N/P ratios of 2.0 (3), 4.0 (4), 8.0 (5), 16.0 (6) and 20.0 (7).

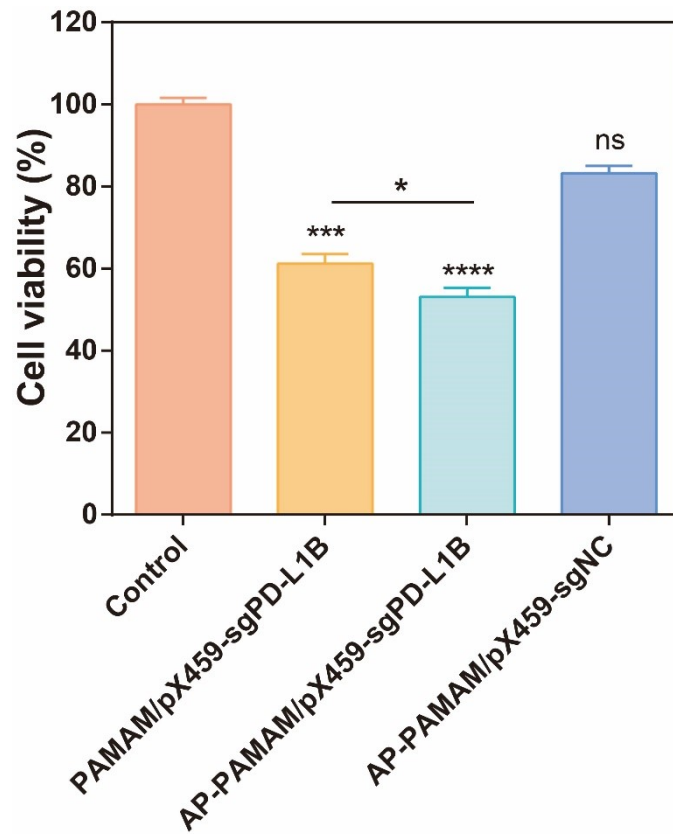

**Figure S5.** The cell viability of B16F10 cells after the transfection of different nanoparticles for 48 h. Data were represented as mean value  $\pm$  SD ( $n = 3$ ; ns, not significant,  $*p < 0.05$ ,  $**p < 0.01$ ,  $***p < 0.001$  and  $****p < 0.0001$ ).



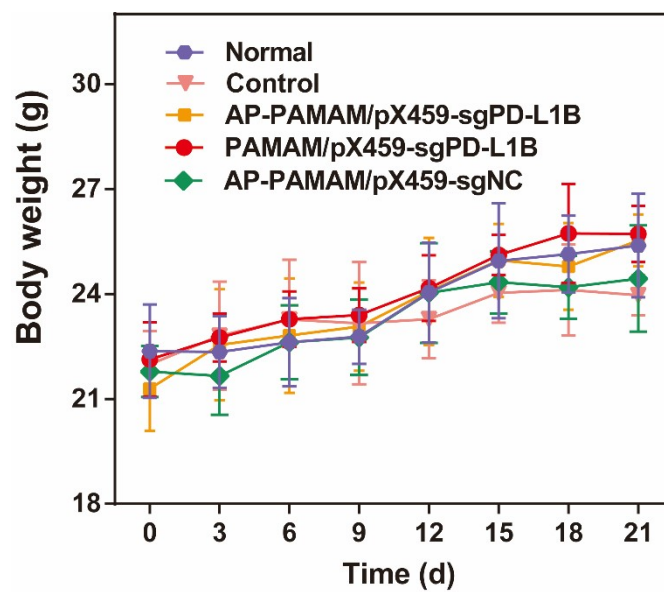

**Figure S6.** Body weight changes during the treatment with different nanoparticles. Data were represented as mean value  $\pm$  SD (n = 6).

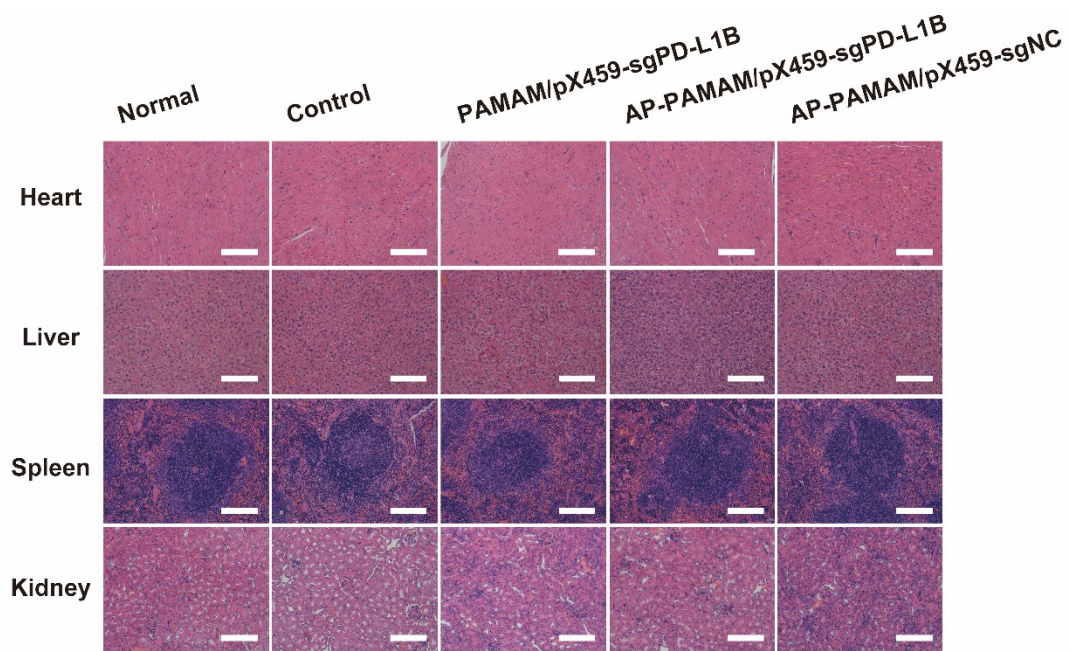

**Figure S7.** H&E staining of different organs (heart, liver, spleen, lung and kidney) after the treatment with different nanoparticles for 21 days. The scale bar was 100  $\mu\text{m}$ .

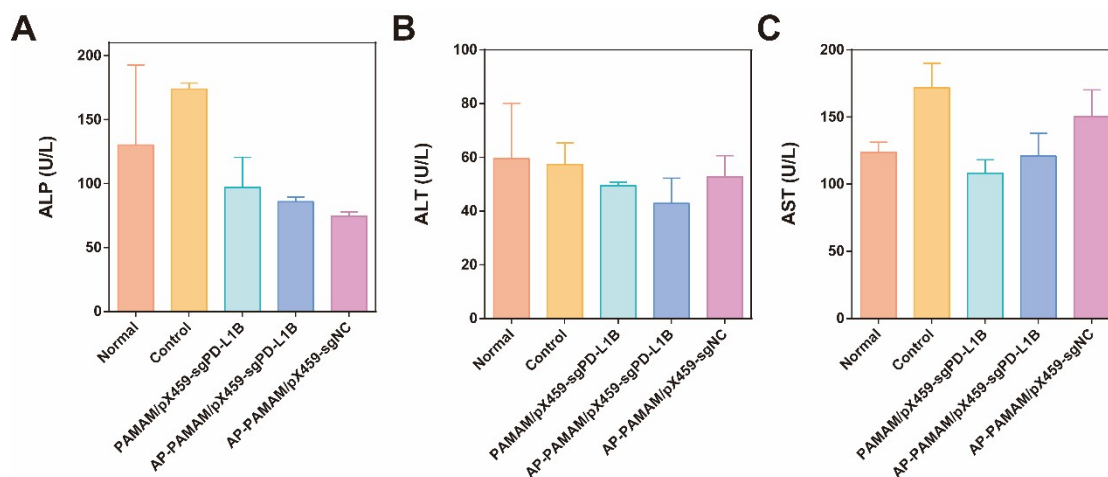

**Figure S8.** Physiological function assessment of liver toxicity after the treatment with different nanoparticles. Data were represented as mean value  $\pm$  SD (n = 3).

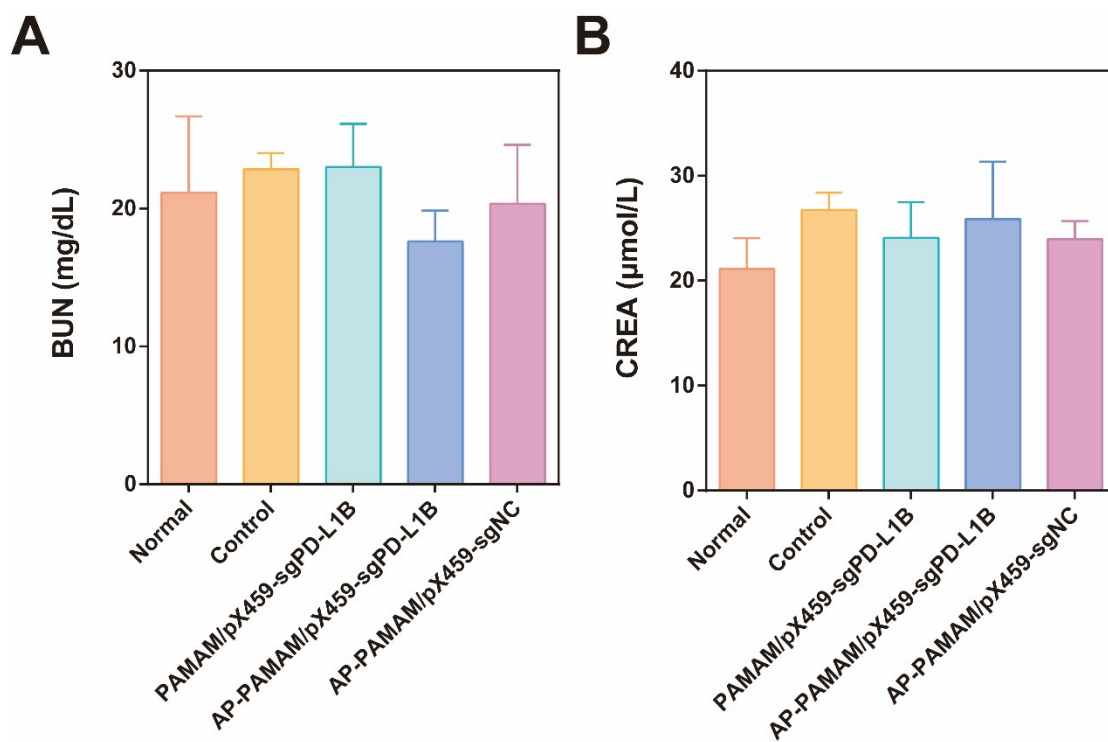

**Figure S9.** Physiological function assessment of kidney toxicity after the treatment with different nanoparticles. Data were represented as mean value  $\pm$  SD (n = 3).
